# Supplementary material for: KnotAli: informed energy minimization through the use of evolutionary information
Source: PubMed Central journal article supplement (PMC9063079; doi:10.1186/s12859-022-04673-3), 2022-05-03
Supplement: 12859_2022_4673_MOESM3_ESM.pdf [file 12859_2022_4673_MOESM3_ESM.pdf]

## Supplementary File 3: P-tables

### 1 MI vs MIp

| family          | MUSCLE |      |      |      | MAFFT |             |      |      |      |      |      |             |
|-----------------|--------|------|------|------|-------|-------------|------|------|------|------|------|-------------|
|                 | MI     |      | MIp  |      | MI    |             | MIp  |      |      |      |      |             |
|                 | sen    | ppv  | F    | sen  | ppv   | F           | sen  | ppv  | F    |      |      |             |
| 5s              | .269   | .950 | .419 | .625 | .894  | <b>.735</b> | .148 | .983 | .252 | .612 | .897 | <b>.726</b> |
| 16s             | .107   | .836 | .189 | .268 | .648  | <b>.378</b> | .125 | .906 | .220 | .315 | .744 | <b>.441</b> |
| 23s             | .041   | .472 | .077 | .110 | .431  | <b>.175</b> | .048 | .504 | .087 | .107 | .395 | <b>.169</b> |
| Group I Intron  | 0      | 0    | 0    | .021 | .478  | <b>.040</b> | .006 | .629 | .012 | .059 | .463 | <b>.104</b> |
| Group II Intron | .003   | .031 | .006 | .005 | .012  | .007        | .015 | .146 | .027 | .047 | .099 | <b>.062</b> |
| RNaseP          | 0      | 0    | 0    | .115 | .658  | <b>.193</b> | .032 | .661 | .061 | .225 | .747 | <b>.338</b> |
| SRP             | .049   | .889 | .089 | .156 | .780  | <b>.238</b> | .078 | .885 | .135 | .126 | .627 | <b>.202</b> |
| telomerase      | 0      | 0    | 0    | .025 | .205  | <b>.044</b> | 0    | 0    | 0    | .018 | .185 | <b>.033</b> |
| tmRNA           | .049   | .983 | .093 | .130 | .917  | <b>.227</b> | .048 | .978 | .091 | .151 | .785 | <b>.252</b> |
| tRNA            | .673   | .972 | .793 | .810 | .973  | <b>.881</b> | .547 | .930 | .684 | .743 | .927 | <b>.819</b> |

Table 1: Mean F-measures for KnotAli when MI is used as the covariation metric versus the results of MIp which are the standard KnotAli covariation measure prior to the thermodynamic portion. Each column represents the mean F-measure for one of the covariation metrics. **BOLD** is used to show significant difference in the results.

| family          | MUSCLE | MAFFT  |
|-----------------|--------|--------|
| 5s              | .00009 | .00009 |
| 16s             | .00009 | .00009 |
| 23s             | .014   | .014   |
| Group I Intron  | .00009 | .00009 |
| Group II Intron | .789   | .00009 |
| RNaseP          | .00009 | .00009 |
| SRP             | .00009 | .00009 |
| telomerase      | .00009 | .00009 |
| tmRNA           | .00009 | .00009 |
| tRNA            | .00009 | .00009 |

Table 2: P-values for KnotAli when MI is used as the covariation metric versus the results of MIp which are the standard KnotAli covariation measure. Each column represents the p-value for one of the covariation metrics.

## 2 Restricted vs non-restricted

| family          | MUSCLE         |             | MAFFT          |             |
|-----------------|----------------|-------------|----------------|-------------|
|                 | Non-Restricted | Restricted  | Non-Restricted | Restricted  |
| 5s              | .850           | <b>.887</b> | .803           | <b>.885</b> |
| 16s             | .515           | .494        | .523           | .519        |
| Group I Intron  | .461           | .461        | .435           | .396        |
| Group II Intron | .154           | .154        | .258           | .295        |
| RNaseP          | .482           | .493        | .539           | <b>.585</b> |
| SRP             | .507           | <b>.564</b> | .390           | .415        |
| telomerase      | <b>.368</b>    | .256        | .235           | .211        |
| tmRNA           | .366           | <b>.477</b> | .495           | .495        |
| tRNA            | .859           | <b>.932</b> | .840           | <b>.886</b> |

Table 3: Mean F-measures for KnotAli when restricted bases are not used in KnotAli versus when they are, which is the standard for KnotAli. Each column represents the mean F-measure. **BOLD** is used to show significant difference in the results.

| family          | MUSCLE | MAFFT  |
|-----------------|--------|--------|
| 5s              | .00009 | .00009 |
| 16s             | .803   | .953   |
| Group I Intron  | .982   | .214   |
| Group II Intron | .816   | .582   |
| RNaseP          | .509   | .002   |
| SRP             | .0003  | .105   |
| telomerase      | .003   | .530   |
| tmRNA           | .00009 | 1      |
| tRNA            | .00009 | .0003  |

Table 4: P-values for KnotAli when restricted bases are not used in KnotAli versus when they are, which is the standard for KnotAli. Each column represents the p-values.

### 3 Gridsearch

| thresh | tRNA | 5s   | SRP  | tmRNA | RNaseP | 16s  | 23s  | Group I Intron | Group II Intron | telomerase |
|--------|------|------|------|-------|--------|------|------|----------------|-----------------|------------|
| -0.2   | .828 | .805 | .290 | .289  | .446   | .486 | .208 | .176           | .083            | .057       |
| -0.1   | .828 | .805 | .290 | .289  | .446   | .490 | .203 | .177           | .083            | .057       |
| 0      | .830 | .808 | .291 | .288  | .446   | .466 | .196 | .177           | .084            | .048       |
| 0.1    | .849 | .788 | .267 | .299  | .450   | .462 | .191 | .169           | .088            | .051       |
| 0.2    | .845 | .763 | .260 | .299  | .423   | .463 | .184 | .168           | .082            | .028       |
| 0.3    | .819 | .729 | .251 | .270  | .386   | .454 | .181 | .140           | .068            | .030       |
| 0.4    | .819 | .726 | .202 | .252  | .338   | .442 | .169 | .104           | .063            | .033       |
| 0.5    | .819 | .677 | .177 | .214  | .296   | .401 | .161 | .044           | .056            | .018       |
| 0.6    | .819 | .639 | .161 | .185  | .253   | .351 | .148 | .026           | .038            | .018       |
| 0.7    | .744 | .592 | .135 | .136  | .180   | .297 | .127 | .012           | .027            | .018       |
| 0.8    | .713 | .524 | .135 | .108  | .106   | .251 | .113 | .012           | .028            | 0          |
| 0.9    | .713 | .375 | .135 | .091  | .075   | .214 | .088 | .012           | .029            | 0          |
| 1      | .684 | .207 | .094 | .073  | .013   | .186 | .074 | .012           | .030            | 0          |
| 1.1    | .651 | .165 | .094 | .057  | 0      | .141 | .048 | .012           | .030            | 0          |
| 1.2    | .651 | .165 | .094 | .038  | 0      | .097 | .014 | 0              | .030            | 0          |
| 1.3    | .489 | .165 | .049 | .038  | 0      | .065 | .005 | 0              | .016            | 0          |
| 1.4    | .155 | .165 | 0    | .020  | 0      | .045 | .002 | 0              | 0               | 0          |
| 1.5    | .008 | 0    | 0    | .020  | 0      | .013 | 0    | 0              | 0               | 0          |

Table 5: The heatmap illustrates the results of a grid search across 21 different possible thresholds on the 10 families. The values of the heatmap represent the mean F-measure for the family at the specific threshold using the MUSCLE aligner.

| thresh | tRNA | 5s   | SRP  | tmRNA | RNaseP | 16s  | 23s  | Group I Intron | Group II Intron | Intr telomerase |
|--------|------|------|------|-------|--------|------|------|----------------|-----------------|-----------------|
| -0.2   | .811 | .81  | .455 | .395  | .540   | .569 | .29  | .244           | .087            | .074            |
| -0.1   | .811 | .81  | .455 | .395  | .540   | .573 | .282 | .246           | .087            | .074            |
| 0      | .815 | .817 | .459 | .400  | .542   | .576 | .359 | .249           | .090            | .069            |
| 0.1    | .903 | .867 | .453 | .486  | .570   | .600 | .365 | .262           | .098            | .088            |
| 0.2    | .925 | .885 | .500 | .637  | .609   | .654 | .372 | .284           | .099            | .064            |
| 0.3    | .927 | .885 | .553 | .700  | .682   | .683 | .383 | .362           | .091            | .081            |
| 0.4    | .927 | .897 | .627 | .785  | .747   | .744 | .395 | .463           | .099            | .185            |
| 0.5    | .927 | .947 | .818 | .854  | .775   | .792 | .421 | .573           | .115            | .192            |
| 0.6    | .927 | .970 | .837 | .897  | .766   | .834 | .443 | .537           | .108            | .247            |
| 0.7    | .930 | .982 | .885 | .951  | .730   | .898 | .551 | .629           | .113            | .608            |
| 0.8    | .929 | .983 | .885 | .975  | .758   | .926 | .555 | .629           | .168            | 0               |
| 0.9    | .929 | .985 | .885 | .978  | .764   | .943 | .648 | .629           | .302            | 0               |
| 1      | .930 | .988 | .885 | .974  | .634   | .945 | .655 | .629           | .818            | 0               |
| 1.1    | .928 | .995 | .885 | .974  | 0      | .956 | .703 | .629           | .818            | 0               |
| 1.2    | .928 | .995 | .885 | .963  | 0      | .965 | .644 | 0              | 1               | 0               |
| 1.3    | .920 | .995 | .871 | .963  | 0      | .973 | .400 | 0              | 1               | 0               |
| 1.4    | .885 | .995 | 0    | .972  | 0      | .974 | 1    | 0              | 0               | 0               |
| 1.5    | .879 | .008 | 0    | .972  | 0      | .947 | 0    | 0              | 0               | 0               |

Table 6: The heatmap illustrates the results of a grid search across 21 different possible thresholds on the 10 families. The values of the heatmap represent the mean PPV for the family at the specific threshold using the MUSCLE aligner.

## 4 Comparison with existing algorithms

| family          | Knot to RNA | Knot to Hex | Knot to Cac | RNA to Hex | RNA to Cac | Hex to Cac |
|-----------------|-------------|-------------|-------------|------------|------------|------------|
| 5s              | .00009      | .00009      | .00009      | .00009     | .00009     | .00009     |
| 16s             | .030        | .838        | .00009      | .011       | .00009     | .00009     |
| 23s             | .014        | .145        | .014        | .014       | .014       | .014       |
| Group I Intron  | .00009      | .00009      | .00009      | .020       | .040       | .674       |
| Group II Intron | .00009      | .003        | .00009      | .211       | 1          | .211       |
| RNaseP          | .00009      | .00009      | .00009      | .00009     | .00009     | .021       |
| SRP             | .00009      | .00009      | .00009      | .521       | .291       | .680       |
| telomerase      | .00009      | .00009      | .00009      | .00009     | .00009     | .409       |
| tmRNA           | .00009      | .00009      | .00009      | .00009     | .0003      | .00009     |
| tRNA            | .059        | .00009      | .447        | .00009     | .007       | .00009     |

Table 7: P-values for KnotAli, RNAalifold, Hxmatch, and Cacofold. Each column represents the p-value for one of the algorithms when compared to one of the other algorithms. These are for when the input alignment are through MUSCLE Abbreviations are made for each algorithm: Knot (KnotAli), RNA (RNAalifold), Hex (Hxmatch), and Cac (Cacofold).

| family          | Knot to RNA | Knot to Hex | Knot to Cac | RNA to Hex | RNA to Cac | Hex to Cac |
|-----------------|-------------|-------------|-------------|------------|------------|------------|
| 5s              | .00009      | .00009      | .00009      | .00009     | .00009     | .00009     |
| 16s             | .007        | .225        | .00009      | .006       | .00009     | .00009     |
| 23s             | .014        | .014        | .430        | .014       | .014       | .014       |
| Group I Intron  | .00009      | .00009      | .00009      | 1          | .019       | .019       |
| Group II Intron | .021        | .008        | .012        | .373       | .891       | .286       |
| RNaseP          | .002        | .00009      | .00009      | .00009     | .00009     | .00009     |
| SRP             | .00009      | .00009      | .00009      | .453       | .00009     | .00009     |
| telomerase      | .0004       | .00009      | .00009      | .004       | .00009     | .00009     |
| tmRNA           | .00009      | .00009      | .00009      | .00009     | .00009     | .00009     |
| tRNA            | .017        | .00009      | .753        | .00009     | .056       | .00009     |

Table 8: P-values for KnotAli, RNAalifold, Hxmatch, and Cacofold. Each column represents the p-value for one of the algorithms when compared to one of the other algorithms. These are for when the input alignment are through MAFFT Abbreviations are made for each algorithm: Knot (KnotAli), RNA (RNAalifold), Hex (Hxmatch), and Cac (Cacofold).

## 5 Varying sequence length in alignment

We restricted the length of two families within our dataset: Group I Intron and SRP. The number of sequences for each family was decreased to 33 and 285, respectively.

When comparing post-shortened results to pre-shortened results, the 33 of the total 89 and 285 of the total 583 sequences were compared for pre-shortened corresponding to the sequences in post-shortened.

| family                | Knot to RNA | Knot to Hex | Knot to Cac | RNA to Hex | RNA to Cac | Hex to Cac |
|-----------------------|-------------|-------------|-------------|------------|------------|------------|
| Group I Intron-MAFFT  | .00009      | .00009      | .00009      | .0002      | .00009     | .00009     |
| SRP-MAFFT             | .00009      | .00009      | .00009      | .1482      | .00009     | .00009     |
| Group I Intron-MUSCLE | .00009      | .00009      | .00009      | .016       | .137       | .136       |
| SRP-MUSCLE            | .00009      | .00009      | .00009      | .0002      | .00009     | .00009     |

Table 9: P-values for KnotAli, RNAalifold, Hxmatch, and Cacofold when the range of length for sequences is shortened. Each column represents the p-value for one of the algorithms when compared to one of the other algorithms. These are for when the input alignment are through MAFFT and MUSCLE. Abbreviations are made for each algorithm: Knot (KnotAli), RNA (RNAalifold), Hex (Hxmatch), and Cac (Cacofold).

| family                | KnotAli | RNAalifold | Hxmatch | Cacofold |
|-----------------------|---------|------------|---------|----------|
| Group I Intron-MAFFT  | .488    | .078       | .078    | .122     |
| SRP-MAFFT             | .391    | .056       | .057    | .125     |
| Group I Intron-MUSCLE | .509    | .119       | .080    | .080     |
| SRP-MUSCLE            | .448    | .101       | .102    | .102     |

Table 10: Mean F-measures for KnotAli, RNAalifold, Hxmatch, and Cacofold in pre-shortened when only the sequences seen in post-shortened are looked at. Each column represents the mean F-measure for one of the algorithms.

## 6 Accuracy measures

| family                | KnotAli | RNAalifold | Hxmatch | Cacofold |
|-----------------------|---------|------------|---------|----------|
| Group I Intron-MAFFT  | .229    | .00009     | .00009  | .427     |
| SRP-MAFFT             | .00009  | .00009     | .00009  | .00009   |
| Group I Intron-MUSCLE | .341    | .0009      | .001    | .00009   |
| SRP-MUSCLE            | .023    | .00009     | .00009  | .00009   |

Table 11: P-values for KnotAli, RNAalifold, Hxmatch, and Cacofold when the range of length for sequences is shortened. Each column represents the p-value for one of the algorithms when compared to its original non-shortened value.

| family          | Knot to RNA | Knot to Hex | Knot to Cac | RNA to Hex | RNA to Cac | Hex to Cac |
|-----------------|-------------|-------------|-------------|------------|------------|------------|
| 5s              | .00009      | .00009      | .00009      | .00009     | .00009     | .00009     |
| 16s             | .094        | .495        | .00009      | .005       | .00009     | .00009     |
| 23s             | .014        | .324        | .014        | .014       | .014       | .014       |
| Group I Intron  | .00009      | .00009      | .00009      | .020       | .089       | .462       |
| Group II Intron | .00009      | .0007       | .0009       | .212       | 1          | .211       |
| RNaseP          | .00009      | .00009      | .00009      | .00009     | .00009     | .00009     |
| SRP             | .00009      | .00009      | .00009      | .999       | .267       | .267       |
| telomerase      | .00009      | .009        | .0003       | .00009     | .00009     | .003       |
| tmRNA           | .00009      | .00009      | .00009      | .00009     | .0004      | .00009     |
| tRNA            | .256        | .00009      | .00009      | .00009     | .006       | .00009     |

Table 12: P-values for KnotAli, RNAalifold, Hxmatch, and Cacofold when compatible bases are not considered as false positive. Each column represents the p-value for one of the algorithms when compared to one of the other algorithms. These are for when the input alignment are through MUSCLE. Abbreviations are made for each algorithm: Knot (KnotAli), RNA (RNAalifold), Hex (Hxmatch), and Cac (Cacofold).

| family          | Knot to RNA | Knot to Hex | Knot to Cac | RNA to Hex | RNA to Cac | Hex to Cac |
|-----------------|-------------|-------------|-------------|------------|------------|------------|
| 5s              | .00009      | .00009      | .00009      | .00009     | .00009     | .00009     |
| 16s             | .005        | .437        | .00009      | .002       | .00009     | .00009     |
| 23s             | .014        | .043        | .430        | .014       | .014       | .014       |
| Group I Intron  | .00009      | .00009      | .00009      | 1          | .009       | .009       |
| Group II Intron | .00009      | .00009      | .0002       | .600       | .870       | .600       |
| RNaseP          | .00009      | .00009      | .00009      | .00009     | .00009     | .00009     |
| SRP             | .00009      | .00009      | .00009      | 1          | .00009     | .00009     |
| telomerase      | .010        | .006        | .00009      | .008       | .00009     | .00009     |
| tmRNA           | .00009      | .00009      | .00009      | .00009     | .00009     | .00009     |
| tRNA            | .00009      | .00009      | .032        | .00009     | .043       | .00009     |

Table 13: P-values for KnotAli, RNAalifold, Hxmatch, and Cacofold when compatible bases are not considered as false positive. Each column represents the p-value for one of the algorithms when compared to one of the other algorithms. These are for when the input alignment are through MAFFT Abbreviations are made for each algorithm: Knot (KnotAli), RNA (RNAalifold), Hex (Hxmatch), and Cac (Cacofold).

| family          | KnotAli | RNAalifold | Hxmatch | Cacofold |
|-----------------|---------|------------|---------|----------|
| 5s              | .00009  | .00009     | .440    | .00009   |
| 16s             | .224    | .388       | .471    | .136     |
| 23s             | .041    | .014       | .014    | .014     |
| Group I Intron  | .005    | .896       | .874    | .863     |
| Group II Intron | .604    | 1          | .816    | 1        |
| RNaseP          | .005    | .672       | .994    | .747     |
| SRP             | .0006   | .520       | .998    | .491     |
| telomerase      | .074    | .217       | .282    | .002     |
| tmRNA           | .00009  | .113       | .640    | .355     |
| tRNA            | .002    | .870       | .897    | .847     |

Table 14: P-values for KnotAli, RNAalifold, Hxmatch, and Cacofold when compatible bases are not considered as false positive. Each column represents the p-value for one of the algorithms compared in this work. These are for when the input alignment are through MUSCLE

| family          | KnotAli | RNAalifold | Hxmatch | Cacofold |
|-----------------|---------|------------|---------|----------|
| 5s              | .00009  | .00009     | .017    | .00009   |
| 16s             | .425    | .279       | .426    | .112     |
| 23s             | .517    | .014       | .014    | .014     |
| Group I Intron  | .0002   | 1          | 1       | .779     |
| Group II Intron | .093    | .930       | .586    | .891     |
| RNaseP          | .00009  | .9425      | .873    | .401     |
| SRP             | .002    | .452       | 1       | .215     |
| telomerase      | .079    | .004       | .075    | .084     |
| tmRNA           | .00009  | .268       | .567    | .090     |
| tRNA            | .009    | .866       | .899    | .818     |

Table 15: P-values for KnotAli, RNAalifold, Hxmatch, and Cacofold when compatible bases are not considered as false positive. Each column represents the p-value for one of the algorithms when compared to its result where compatible bases are considered false positives. These are for when the input alignment are through MAFFT
